# Supplementary material
Source: Research Square preprint supplement (doi:10.21203/rs.3.rs-9637873/v1)
Supplement: Supplementary file 1 [file e671bc78ff23955260eb3e03.docx]

**Supplementary files**

Appendix A Supplementary Tables …………………………………………………………………...

Appendix B Supplementary Figures ………………………………………………………………….

**Table S1:** Baseline characteristics of patients in the surveillance group and the usual care group.

|  | **Surveillance Group (N=XXX)** | **Usual Care Group (N=XXX)** |
| --- | --- | --- |
| Age- median (IQR) |  |  |
| Sex **-** n (%) |  |  |
| Height - median (IQR) |  |  |
| Weight - median (IQR) |  |  |
| BMI- median (IQR) |  |  |
|  |  |  |
| **Admission category** - n (%) |  |  |
| Non-operative non-trauma |  |  |
| Post-operative non-trauma |  |  |
| Trauma |  |  |
|  |  |  |
| **Location prior to ICU admission** - n (%) |  |  |
| Emergency room |  |  |
| Hospital ward |  |  |
| Operating room/Recovery room |  |  |
| Other |  |  |
|  |  |  |
| **APACHE IV score** - median (IQR) |  |  |
|  |  |  |
|  |  |  |
| **Chronic health illnesses** - n (%) |  |  |
| Chronic renal failure/Hemodialysis |  |  |
| Hepatic failure/Cirrhosis |  |  |
| Chronic respiratory disease (Chronic restrictive, obstructive, or vascular disease resulting in severe exercise restriction) |  |  |
| Chronic cardiovascular disease (New York Heart Association Class IV (Severe) |  |  |
| Metastatic cancer |  |  |
| Lymphoma |  |  |
| Leukemia/myeloma |  |  |
| Immunosuppression (chemotherapy, radiation, long term or recent high dose steroids) |  |  |
| AIDS |  |  |
| None |  |  |
|  |  |  |
| **Pre-ICU conditions that may influence VTE risk** - n (%) |  |  |
| Personal history of VTE |  |  |
| Family history of VTE |  |  |
| Known thrombophilic state: protein C, protein S or antithrombin deficiency, TTP, HUS, activated protein C resistance, factor V Leiden, prothrombin gene mutation, antiphospholipid antibody, hyperhomocysteinemia |  |  |
| Post-partum (within 3 months) |  |  |
| Estrogen therapy (oral contraceptive or hormone replacement) |  |  |
| Active malignancy (treatment within past 6 months or palliation) |  |  |
| History of malignancy (not on treatment in the last 6 months) |  |  |
| Paralysis or immobilization of a lower or upper extremity related to stroke or injury prior to this hospital admission |  |  |
| Hospitalization in the past 3 months for any reason (excluding this hospital admission) |  |  |
| Trauma |  |  |
| Recent surgery (in the last 48 hours) |  |  |
| Acute stroke (this hospital admission) |  |  |
| Current smoker |  |  |
| None of the above |  |  |
|  |  |  |
| VTE risk assessment scores - median (IQR) |  |  |
| ICU-VTE |  |  |
| Kucher |  |  |
| Intermountain/Utah |  |  |
| Caprini |  |  |
| Padua |  |  |
| IMPROVE |  |  |
|  |  |  |
| **Laboratory results prior to randomization** - median (IQR) |  |  |
| INR (highest) |  |  |
| Creatinine (highest) |  |  |
| Platelets (lowest) |  |  |
| PTT (highest) |  |  |
| Hemoglobin (lowest) |  |  |
|  |  |  |
| **ICU support** - n (%) |  |  |
| Mechanical ventilation |  |  |
| Vasopressor use |  |  |
| Renal replacement therapy |  |  |
| Femoral central Venous Lines |  |  |
|  |  |  |
| **Number of days from ICU admission to randomization** - median (IQR) |  |  |
|  |  |  |
| **Admitted with major bleeding** - n (%) |  |  |
| **Symptomatic bleeding in a critical area or organ** |  |  |
| Intracranial |  |  |
| Intra-spinal |  |  |
| Intraocular |  |  |
| Intra-articular |  |  |
| Pericardial |  |  |
| Intramuscular with compartment syndrome |  |  |
| Others |  |  |
|  |  |  |
| **Severe bleeding in other organs** - n (%) |  |  |
| Fall in hemoglobin level of >=20 g L-1 |  |  |
| Transfusion of >=2 units of red cells |  |  |
| Hemorrhagic shock |  |  |
| Requirement of an invasive intervention |  |  |
|  |  |  |
| **Location** - n (%) |  |  |
| Gastrointestinal |  |  |
| Retroperitoneal |  |  |
| Other soft tissue bleeding |  |  |
| Respiratory |  |  |
| Surgical site |  |  |
| Vaginal |  |  |
| Hematuria |  |  |
| Epistaxis |  |  |
| Surgical site bleeding |  |  |
|  |  |  |
| **COVID-19 diagnosis** - n (%) |  |  |

**Table S2:**  Interventions and co-interventions of patients in the surveillance group and those in the usual care group

|  | **Surveillance Group (N=XXX)** | **Usual care Group (N=XXX)** |
| --- | --- | --- |
| **Lower extremities ultrasonography** |  |  |
| Patients with at least one ultrasonography, n (%) |  |  |
| Days to first ultrasonography examination - median (IQR) |  |  |
| Number of ultrasonography examinations - median (IQR) |  |  |
|  |  |  |
| **Pharmacologic prophylaxis on day 1** - n (%) |  |  |
| Prophylactic UFH |  |  |
| Prophylactic LMWH |  |  |
|  |  |  |
| **Mechanical prophylaxis on day 1** - n (%) |  |  |
| IPC |  |  |
| GCS |  |  |
|  |  |  |
| **Pharmacologic prophylaxis at any time during intervention period** - n (%) |  |  |
| Prophylactic UFH |  |  |
| Prophylactic LMWH |  |  |
|  |  |  |
| **Mechanical prophylaxis at any time during intervention period** - n (%) |  |  |
| IPC |  |  |
| GCS |  |  |
|  |  |  |
| **Therapeutic anticoagulation (started after randomization) during this ICU admission** - n (%) |  |  |
| Therapeutic heparin |  |  |
| Therapeutic LMWH |  |  |
| Warfarin |  |  |
| Direct oral anticoagulants (DOACs) |  |  |
| Argatroban |  |  |
| Fondaparinux |  |  |
| Thrombolytics (TpA / Streptokinase) |  |  |
|  |  |  |
| **Anti-platelet Therapy** - n (%) |  |  |
| Aspirin |  |  |
| Clopidogrel |  |  |
| Glycoprotein IIa / IIIb Inhibitor |  |  |
| Ticlopidine |  |  |
|  |  |  |
| **ICU support** - n (%) |  |  |
| Mechanical ventilation |  |  |
| Vasopressor use |  |  |
| Renal replacement therapy |  |  |
| Femoral central Venous Lines |  |  |
|  |  |  |
| **Transfusion** - n (%) |  |  |
| PRBC transfusion |  |  |
| FFP |  |  |
| Cryoprecipitate |  |  |
| Platelets |  |  |
| **Other medications** |  |  |
| Factor VII |  |  |
| Vitamin K |  |  |
|  |  |  |
| **Mobility** (highest level of during intervention period) - n (%) |  |  |
| 0- Nothing |  |  |
| 1- Transfer to bed to chair without standing |  |  |
| 2- Sitting in bed/exercises in bed |  |  |
| 3- Sitting at edge of bed |  |  |
| 4- Standing |  |  |
| 5- Transfer from bed to chair with standing |  |  |
| 6- Marching in place |  |  |
| 7- Walking |  |  |
| 8- Unknown |  |  |
| **IVC filter placed for prophylaxis** - n (%) |  |  |
|  |  |  |
| **Other diagnostic tests** - n (%) |  |  |
| Ultrasonography for upper extremities and neck to evaluate for thrombosis |  |  |
| Patients with spiral CT (also called CT angiograms or helical CTscan) of chest to evaluate for PE |  |  |
| Patients with V/Q scan of the lung |  |  |
| Patients with CT scan of the abdomen to evaluate thrombosis– |  |  |
| Patients with transthoracic echocardiograms– |  |  |
| Patients with transesophageal echograms |  |  |

**Table S3:** Ultrasound performance data showing the expected and actual number of ultrasounds performed according to the number of days in the study.

|  | **Expected number of ultrasounds** | **Number of patients** | | **Total number of ultrasounds** | | **Median number of ultrasounds (IQR)** | | **Mean±SD number of ultrasounds** | | **Average days/ultrasound*** | |
| --- | --- | --- | --- | --- | --- | --- | --- | --- | --- | --- | --- |
|  |  | **Surveillance Group (N=XXX)** | **Usual care Group (N=XXX)** | **Surveillance Group (N=XXX)** | **Usual care Group (N=XXX)** | **Surveillance Group (N=XXX)** | **Usual care Group (N=XXX)** | **Surveillance Group (N=XXX)** | **Usual care Group (N=XXX)** | **Surveillance Group (N=XXX)** | **Usual care Group (N=XXX)** |
| All patients |  |  |  |  |  |  |  |  |  |  |  |
| Patients in the study for 1-3 days | 1 |  |  |  |  |  |  |  |  |  |  |
| Patients in the study for 4-7 days | 2 |  |  |  |  |  |  |  |  |  |  |
| Patients in the study for 8-10 days | 3 |  |  |  |  |  |  |  |  |  |  |
| Patients in the study for 11-14 days | 4 |  |  |  |  |  |  |  |  |  |  |
| Patients in the study for 15-17 days | 5 |  |  |  |  |  |  |  |  |  |  |
| Patients in the study for 18-21 days | 6 |  |  |  |  |  |  |  |  |  |  |
| Patients in the study for 22-24 days | 7 |  |  |  |  |  |  |  |  |  |  |
| Patients in the study for 25 days or more | 8 |  |  |  |  |  |  |  |  |  |  |

*Average days/ultrasound will be calculated by dividing the total number of study days for the group over the number of ultrasounds.

**Table S4:** The primary outcome of 90-day mortality in the intention-to-treat population and in the per-protocol population.

|  | **Intention-to-treat population** | | | **Per-protocol population** | |
| --- | --- | --- | --- | --- | --- |
|  | **Surveillance Group (N=XXX)** | **Usual careGroup (N=XXX)** | **P Value** | **Surveillance Group (N=XXX)** | **Usual care Group (N=XXX)** |
| 90-day mortality - n/N (%) | xx/xxx (x.x) | xx/xxx (x.x) |  | xx/xxx (x.x) | xx/xxx (x.x) |
| Primary analysis- Relative Risk, (95% CI) | x.xx (x.xx, x.xx) | | x.xx | x.xx (x.xx, x.xx) | |
| Secondary analyses |  | |  |  | |
| Adjusted relative risk* | x.xx (x.xx, x.xx) | |  | x.xx (x.xx, x.xx) | |
| Sensitivity analyses using a multiple imputations model, Adjusted Relative Risk, (95% CI) | x.xx (x.xx, x.xx) | |  | x.xx (x.xx, x.xx) | |
| Unadjusted Cox proportional hazard models, Unadjusted hazard ratio, (95% CI) | x.xx (x.xx, x.xx) | |  | x.xx (x.xx, x.xx) | |
| Adjusted Cox proportional hazard models, Adjusted hazard ratio, (95% CI) | x.xx (x.xx, x.xx) | |  | x.xx (x.xx, x.xx) | |

*****The generalized linear mixed effects model (GLMM) will be used to estimate the adjusted relative risk after incorporating site as a random effect. For the intention-to-treat population, marginal least square estimates is x.xxx (standard error x.xx) for **surveillance group** and x.xxx (standard error x.xx) for the **usual care group** with center estimate of variation x.xx (standard error x.xx).

**Table S5:** Secondary and exploratory outcomes

| **Variable** | **Surveillance Group (N=XXX)** | **Usual care Group (N=XXX)** | **Relative Risk/Hazard ratio/Diffrence, (95% CI)** | **P-value** | **FDR** |
| --- | --- | --- | --- | --- | --- |
| **Proximal lower extremities DVT** - n (%) | xxxx (xx.x) | xxxx (xx.x) | x.xx (x.xx , x.xx) | x.xxx |  |
| Unilateral DVT – n (%) | xxxx (xx.x) | xxxx (xx.x) | x.xx (x.xx , x.xx) |  |  |
| Bilateral DVT – n (%) | xxxx (xx.x) | xxxx (xx.x) | x.xx (x.xx , x.xx) |  |  |
| Number of veins with DVT - median (IQR) | xx (xx, xx) | xx (xx, xx) |  |  |  |
| Complete occlusion (with one vein at least non-  compressible) - n (%) | xxxx (xx.x) | xxxx (xx.x) | x.xx (x.xx , x.xx) |  |  |
| Incomplete occlusion (with all veins at least partially  compressible) - n (%) | xxxx (xx.x) | xxxx (xx.x) | x.xx (x.xx , x.xx) |  |  |
|  |  |  |  |  |  |
| Central venous catheter –related DVT - n (%) | xxxx (xx.x) | xxxx (xx.x) | x.xx (x.xx , x.xx) |  |  |
| Distal DVT (Incident + Prevalent) - n/N (%) | xxxx (xx.x) | xxxx (xx.x) | x.xx (x.xx , x.xx) |  |  |
| All lower extremity DVT (all proximal and distal) - n/N (%) | xxxx (xx.x) | xxxx (xx.x) | x.xx (x.xx , x.xx) |  |  |
|  |  |  |  |  |  |
| **Pulmonary Embolism– n/N (%)** | xxxx (xx.x) | xxxx (xx.x) | x.xx (x.xx , x.xx) | x.xxx |  |
| Extent of PE – n (%) |  |  |  |  |  |
| Unilateral | xxxx (xx.x) | xxxx (xx.x) | x.xx (x.xx , x.xx) |  |  |
| Bilateral | xxxx (xx.x) | xxxx (xx.x) | x.xx (x.xx , x.xx) |  |  |
| PE with cardiopulmonary complications | xxxx (xx.x) | xxxx (xx.x) | x.xx (x.xx , x.xx) |  |  |
| Composite all lower extremity DVT and PE - n (%) | xxxx (xx.x) | xxxx (xx.x) | x.xx (x.xx , x.xx) |  |  |
|  |  |  |  |  |  |
| **Clinically significant bleeding** - n (%) | xxxx (xx.x) | xxxx (xx.x) | x.xx (x.xx , x.xx) | x.xxx |  |
| Fatal bleeding | xxxx (xx.x) | xxxx (xx.x) | x.xx (x.xx , x.xx) |  |  |
| Symptomatic bleeding in a critical area or organa | xxxx (xx.x) | xxxx (xx.x) | x.xx (x.xx , x.xx) |  |  |
| Other severe bleedingb | xxxx (xx.x) | xxxx (xx.x) | x.xx (x.xx , x.xx) |  |  |
|  |  |  |  |  |  |
| Ventilator-free days - median (IQR) | xx (xx, xx) | xx (xx, xx) | x.xx (x.xx , x.xx) | x.xxx |  |
| Vasopressor-free days - median (IQR) | xx (xx, xx) | xx (xx, xx) | x.xx (x.xx , x.xx) | x.xxx |  |
| Number of days alive and out of hospital by day 90 - median (IQR) | xxxx (xx.x) | xxxx (xx.x) | x.xx (x.xx , x.xx) | x.xxx |  |
|  |  |  |  |  |  |
| **Other outcomes (descriptive**) |  |  |  |  |  |
| Serious adverse events (SAEs) - n (%) | xxxx (xx.x) | xxxx (xx.x) | x.xx (x.xx , x.xx) |  |  |
|  |  |  |  |  |  |
| Duration of MV - median (IQR) | xx (xx, xx) | xx (xx, xx) | x.xx (x.xx , x.xx) |  |  |
| Duration of Vasopressor use - median (IQR) | xx (xx, xx) | xx (xx, xx) | x.xx (x.xx , x.xx) |  |  |
| ICU LOS - median (IQR) | xx (xx, xx) | xx (xx, xx) | x.xx (x.xx , x.xx) |  |  |
| ICU-free days - median (IQR) | xx (xx, xx) | xx (xx, xx) |  |  |  |
| Hospital LOS - median (IQR) | xx (xx, xx) | xx (xx, xx) | x.xx (x.xx , x.xx) |  |  |
|  |  |  |  |  |  |
| ICU mortality – n (%) | xxxx (xx.x) | xxxx (xx.x) | x.xx (x.xx , x.xx) |  |  |
| 28-day mortality - n (%) | xxxx (xx.x) | xxxx (xx.x) | x.xx (x.xx , x.xx) |  |  |
| Composite endpoint of lower extremities DVT, PE and 28-day mortality - n (%) | xxxx (xx.x) | xxxx (xx.x) | x.xx (x.xx , x.xx) |  |  |
| Hospital Mortality – n (%) | xxxx (xx.x) | xxxx (xx.x) | x.xx (x.xx , x.xx) |  |  |

Denominator of the percentage is the total number of subjects in each group in the ITT and PP population.

Mechanical Ventilation free days Vasopressor free days and ICU free days are calculated based on 28-d observation

**DVT**: Deep Vein Thrombosis; **PE**: Pulmonary Embolism; **LOS**: Length of Stay

aSymptomatic bleeding in a critical area or organ, is defined as bleeding in intracranial, intraspinal, intraocular, retroperitoneal, intra-articular or pericardial, or intramuscular with compartment syndrome.

bOther severe bleeding is defined as a bleeding with with one of the following: a. a fall in hemoglobin level of 20 g /L or more**, b.** transfusion of two or more units of whole blood or red cells, c. hemorrhagic shock **or d.** requirement of an intervention (for example, interventional radiology, surgery).

**Table S6:** Subgroup analyses

|  | **Surveillance Group (N=XXX)** | **Usual care Group (N=XXX)** | **Relative Risk, (95% CI)** | **P-value** | **P-value for interaction** | **FDR** |
| --- | --- | --- | --- | --- | --- | --- |
| Non-operative non-trauma | xxxx/xxxx (xx.x) | xxxx/xxxx (xx.x) | x.xx (x.xx, x.xx) | x.xxx | x.xxx | x.xxx |
| Post-operative non-trauma | xxxx/xxxx (xx.x) | xxxx/xxxx (xx.x) | x.xx (x.xx, x.xx) | x.xxx |  |  |
| Trauma | xxxx/xxxx (xx.x) | xxxx/xxxx (xx.x) | x.xx (x.xx, x.xx) | x.xxx |  |  |
|  |  |  |  |  |  |  |
| Pharmacologic thromboprophylaxis | xxxx/xxxx (xx.x) | xxxx/xxxx (xx.x) | x.xx (x.xx, x.xx) | x.xxx | x.xxx | x.xxx |
| No pharmacologic thromboprophylaxis | xxxx/xxxx (xx.x) | xxxx/xxxx (xx.x) | x.xx (x.xx, x.xx) | x.xxx |  |  |
|  |  |  |  |  |  |  |
| Femoral central venous catheter | xxxx/xxxx (xx.x) | xxxx/xxxx (xx.x) | x.xx (x.xx, x.xx) | x.xxx | x.xxx | x.xxx |
| No femoral central venous catheter | xxxx/xxxx (xx.x) | xxxx/xxxx (xx.x) | x.xx (x.xx, x.xx) | x.xxx |  |  |
|  |  |  |  |  |  |  |
| Coagulopathy | xxxx/xxxx (xx.x) | xxxx/xxxx (xx.x) | x.xx (x.xx, x.xx) | x.xxx | x.xxx | x.xxx |
| No Coagulopathy | xxxx/xxxx (xx.x) | xxxx/xxxx (xx.x) | x.xx (x.xx, x.xx) | x.xxx |  |  |
|  |  |  |  |  |  |  |
| BMI <30 kg/m2 | xxxx/xxxx (xx.x) | xxxx/xxxx (xx.x) | x.xx (x.xx, x.xx) | x.xxx | x.xxx | x.xxx |
| BMI >30 kg/m2 | xxxx/xxxx (xx.x) | xxxx/xxxx (xx.x) | x.xx (x.xx, x.xx) | x.xxx |  |  |
|  |  |  |  |  |  |  |
| Mechanical ventilation | xxxx/xxxx (xx.x) | xxxx/xxxx (xx.x) | x.xx (x.xx, x.xx) | x.xxx | x.xxx | x.xxx |
| No mechanical ventilation | xxxx/xxxx (xx.x) | xxxx/xxxx (xx.x) | x.xx (x.xx, x.xx) | x.xxx |  |  |
|  |  |  |  |  |  |  |
| Vasopressors | xxxx/xxxx (xx.x) | xxxx/xxxx (xx.x) | x.xx (x.xx, x.xx) | x.xxx | x.xxx | x.xxx |
| No vasopressors | xxxx/xxxx (xx.x) | xxxx/xxxx (xx.x) | x.xx (x.xx, x.xx) | x.xxx |  |  |
|  |  |  |  |  |  |  |
| APACHE IV score <median | xxxx/xxxx (xx.x) | xxxx/xxxx (xx.x) | x.xx (x.xx, x.xx) | x.xxx | x.xxx | x.xxx |
| APACHE IV score >median | xxxx/xxxx (xx.x) | xxxx/xxxx (xx.x) | x.xx (x.xx, x.xx) | x.xxx |  |  |
|  |  |  |  |  |  |  |
| Caprini risk assessment score<5 | xxxx/xxxx (xx.x) | xxxx/xxxx (xx.x) | x.xx (x.xx, x.xx) | x.xxx | x.xxx | x.xxx |
| Caprini risk assessment score>5 | xxxx/xxxx (xx.x) | xxxx/xxxx (xx.x) | x.xx (x.xx, x.xx) | x.xxx |  |  |

.

**Table S7:** Protocol violations and deviations.

|  | **Surveillance Group (N=XXX)** | **Usual care Group (N=XXX)** |
| --- | --- | --- |
| The patient randomized did not meet all the inclusion criteria while meeting exclusion criteria – n (%) |  |  |
| Ultrasound was not performed throughout the intervention period in the surveillance group – n (%) |  |  |
| Patients in control group received surveillance ultrasounds by error – n (%) |  |  |
| Admission ultrasound not done within 3 days of enrolment – n (%) |  |  |
| Twice weekly screening ultrasound was performed late (>24hrs) – n (%) |  |  |

**Appendix B**

**Figures**

**Figure 1:** Consort flow diagram

**Figure 2:** Kaplan Meier curve for mortality

**Figure 3:** Kaplan-Meier time-to-event curves for survival free of incident deep-vein thrombosis

**Figure 4:** Serial data: A. SOFA scores, B. Mobility levels

**Figure 5:**  Forest plot for subgroup analyses
